# Supplementary material for: Characterization and comparison of uniform hydrophilic/hydrophobic transparent silica aerogel beads: skeleton strength and surface modification
Source: Royal Society of Chemistry journal article supplement (doi:10.1039/c5ra08714g), 2015-01-01
Supplement: c5ra08714g2.pdf [file c5ra08714g2.pdf]

## Characterization and comparison of uniform hydrophilic/hydrophobic transparent silica aerogel beads: skeleton strength and surface modification

Sekai Zong<sup>1‡</sup>, Wei Wei<sup>1,2‡</sup>, Zhifeng Jiang<sup>1</sup>, Zaoxue Yan<sup>1</sup>, Jianjun Zhu<sup>1</sup> and Jimin Xie<sup>1\*</sup>

<sup>1</sup>School of Chemistry and Chemical Engineering, Jiangsu University, Zhenjiang, 212013, PR China

<sup>2</sup>Center of Analysis and Test, Jiangsu University, Zhenjiang, 212013, PR China

‡The first two authors contributed equally to this work.

\*Corresponding authors: J.M. Xie; Tel.: +86-11-8879-1708; Fax: +86-11-8879-1800;  
E-mail: xiejm391@sohu.com

### Supporting Information

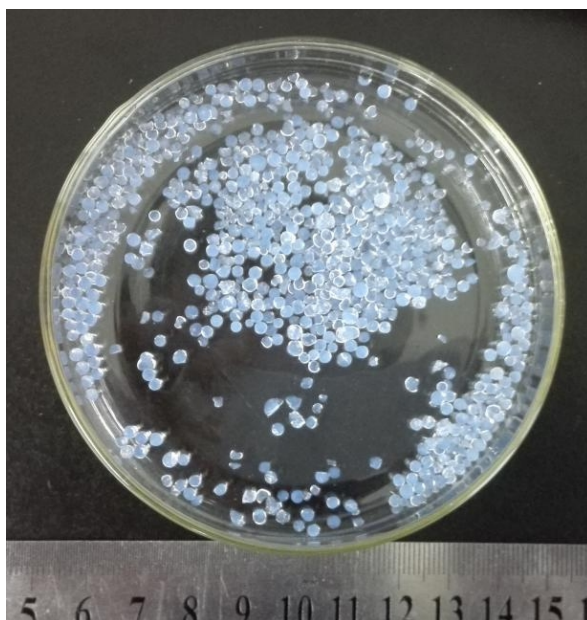

**Fig. S1** The picture of the silica aerogel beads (Sil-S) adsorbed the dye after the calcination.

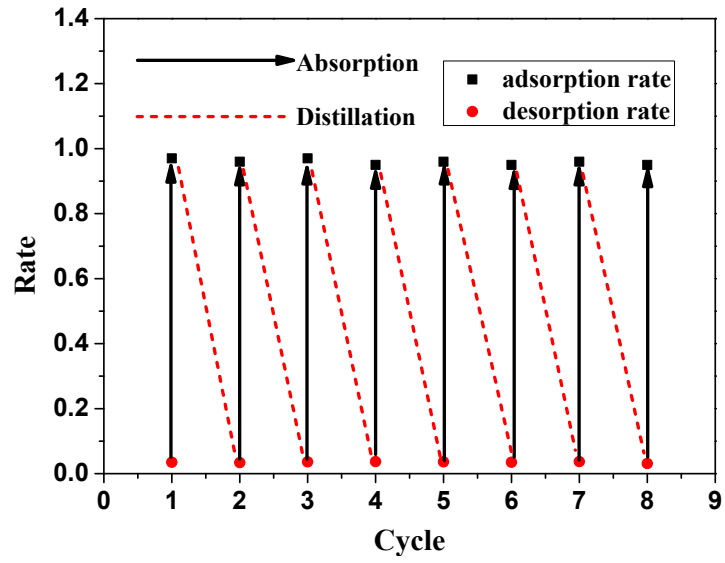

**Fig. S2** The recyclability study of silica aerogel beads (Sil-S) via solvent decortion.

**Movie S1.** This video shows that silica aerogels after three thermal water kettles with weight of 5.5 kg was placed on the top of four silica aerogel beads (Sil-S).
